# Supplementary material for: Growth differentiation factor 15 ameliorates nonalcoholic steatohepatitis and related metabolic disorders in mice
Source: PubMed Central journal article supplement (PMC5931608; doi:10.1038/s41598-018-25098-0), 2018-05-01
Supplement: 41598_2018_25098_MOESM1_ESM.pdf [file 41598_2018_25098_MOESM1_ESM.pdf]

## **Supplementary Information**

# **Growth differentiation factor 15 ameliorates nonalcoholic steatohepatitis and related metabolic disorders in mice**

Kook Hwan Kim, Seong Hun Kim, Dai Hoon Han, Young Suk Jo, Yong-ho Lee, Myung-Shik Lee

### **<CONTENTS>**

**Supplementary Tables**

**Supplementary Figures**

## Supplementary Table 1

Clinical characteristics of human subjects used in this study.

| Group            | No | Gender | Age | BMI   | Diagnosis      | Liver metastasis |
|------------------|----|--------|-----|-------|----------------|------------------|
| Control          | 1  | F      | 57  | 16.78 | Rectal cancer  | Y                |
|                  | 2  | M      | 75  | 20.76 | AGC            | Y                |
|                  | 3  | M      | 34  | 24.36 | RSC, FAP       | Y                |
|                  | 4  | M      | 57  | 26.89 | Rectal cancer  | Y                |
|                  | 5  | F      | 47  | 17.12 | Sigmoid cancer | Y                |
|                  | 6  | F      | 48  | 22.43 | RSC            | Y                |
| Simple steatosis | 1  | M      | 38  | 18.57 | Rectal cancer  | Y                |
|                  | 2  | F      | 49  | 21.88 | Colon cancer   | Y                |
|                  | 3  | M      | 58  | 23.53 | Rectal cancer  | Y                |
|                  | 4  | M      | 66  | 23.57 | Colon cancer   | Y                |
|                  | 5  | F      | 52  | 27.34 | Colon cancer   | Y                |
|                  | 6  | F      | 62  | 25.68 | Colon cancer   | Y                |
| NASH             | 1  | M      | 65  | 24.84 | Rectal cancer  | Y                |
|                  | 2  | M      | 59  | 26.57 | HCC            | N                |
|                  | 3  | M      | 76  | 24.79 | HCC            | N                |
|                  | 4  | M      | 67  | 27.31 | HCC            | N                |
|                  | 5  | M      | 78  | 20.83 | HCC            | N                |
|                  | 6  | M      | 55  | 25.05 | Sigmoid cancer | Y                |

\*AGC (advanced gastric cancer)

RSC (Rectosigmoid junction cancer)

FAP (Familial adenomatous polyposis)

HCC (Hepatocellular carcinoma)

## Supplementary Table 2

Primers used in real-time RT-PCR (5' to 3').

| Gene            | Forward                | Reverse                 |
|-----------------|------------------------|-------------------------|
| <i>mAcaca</i>   | CCAGGCCATGTTGAGACGCT   | ATCACAGAGCGGACGCCATC    |
| <i>mAcadl</i>   | GGAATGAAAGCTCAGGACA    | AGAATCCGCATTAGCTGCAT    |
| <i>mAcadm</i>   | AGTTTTCAAGATCGCAATGG   | CTCCTTGGTGCTCCACTAGC    |
| <i>hACTA2</i>   | GGCAAGTGATCACCATCGGA   | GTGGTTTCATGGATGCCAGC    |
| <i>mActa2</i>   | ATGCTAACAACGTCCTGTCA   | AGAGTACTTGCGTTCTGGAG    |
| <i>mCcl2</i>    | CCCAATGAGTAGGCTGGAGA   | TCTGGACCCATTCTTCTTG     |
| <i>mCd36</i>    | TCTTTGAGCCTTCACTGTCT   | CTCAATGTCCGAGACTTTTC    |
| <i>mChop</i>    | GAAGCCTGGTATGAGGATCT   | ACTGACCACTCTGTTTCCGT    |
| <i>mClec4F</i>  | GACCATTGGATTGGGCTCAC   | CTCGCTCTCCGTTCTATGT     |
| <i>hCOL1A1</i>  | GCTTCACCTACAGCGTCACT   | AAGCCGAATTCTGGTCTGG     |
| <i>mColl1a1</i> | GCTCCTCTTAGGGGCCACT    | CCACGTCTCACCATTGGGG     |
| <i>mCpt1a</i>   | CCGATCATGGTTAACAGCAA   | TGCAGCAGAGATTTGGCATA    |
| <i>mFasn</i>    | CTCCGTGGACCTTATCACTA   | CTGGGAGAGGTTGTAGTCAG    |
| <i>hGDF15</i>   | CTCCAGATTCCGAGAGTTGC   | CACTTCTGGCGTGAGTATCC    |
| <i>mGdf15</i>   | AGTGTCCCCACCTGTATCG    | TGTCCTGTGCATAAGAACCA    |
| <i>mGli1</i>    | CGGCCAATCACAAATCAGGC   | CACAGCTGGGGTTGGTATCC    |
| <i>mGli2</i>    | CTGAGCCCAAACATTGTCAG   | CTGATGGGATGACAGAAGGT    |
| <i>mIhh</i>     | GGCCATCACTCAGAGGAGTC   | TTTCGGTCACGGTCTGAGGT    |
| <i>mIlf6</i>    | CAACCACGGCCTTCCCTACT   | TTCTGCAAGTGCATCATCGTTGT |
| <i>mLipc</i>    | AGCCTACTTTTACCATGTGC   | AGAGTGGTGAGGTTCTATGC    |
| <i>mLipe</i>    | AAGGACTTGAGCAACTCAGA   | TTGACTATGGGTGACGTGTA    |
| <i>mLpl</i>     | ATGGAGAGCAAAGCCCTGCTC  | ATACTCAAAGTTAGGCCCAGC   |
| <i>mMgl1</i>    | GACGGACAGTACCTCTTTTG   | AGAAAAGTAGGTTGGCCTCT    |
| <i>hOPN</i>     | AGAGTGCTGAAACCCACAGC   | GGAATTCACGGCTGACTTTGG   |
| <i>mOpn</i>     | AGGACAACAACGGAAAGGGC   | ATCCGACTGATCGGCACTCT    |
| <i>mPnpla2</i>  | CATGATGGTGCCCTATACTC   | GTGAGAGGTTGTTTCGTACC    |
| <i>mPpara</i>   | GGATGTCACACAATGCAATTCG | TCACAGAACGGCTTCTCAGGT   |
| <i>mPparg</i>   | ATCCCTGGTTTCATTAACCT   | GCTCCATAAAGTCAACAAAG    |
| <i>mPtch1</i>   | ATGAGAGCTACCCTGAGACT   | TCACATTCCACGTCCTGTAG    |
| <i>hRPL32</i>   | CATCCGGCACCAGTCAGACC   | TGTGAGCGATCTCGGCACAG    |

|                |                      |                         |
|----------------|----------------------|-------------------------|
| <i>mRpl32</i>  | CAGTCAGACCGATATGTGAA | TAGAGGACACATTGTGAGCA    |
| <i>mScd1</i>   | TGGAAATGCCTTTGAGATGG | CCAGCCAGCCTCTTGACTAT    |
| <i>mSrebf1</i> | TGCGGCTGTTGTCTACCATA | TGCTGGAGCTGACAGAGAAA    |
| <i>hTGFB1</i>  | TGGTGGAAACCCACAACGAA | GAGCAACACGGGTTTCAGGTA   |
| <i>mTgfb1</i>  | TGAGTGGCTGTCTTTTGACG | GGTTCATGTCATGGATGGTG    |
| <i>mTimp1</i>  | CTTGGTTCCTGGCGTACTC  | ACCTGATCCGTCCACAAACAG   |
| <i>hTIMP2</i>  | GCAACAGGCGTTTTGCAATG | GTGATGTGCATCTTGCCGTC    |
| <i>mTnf</i>    | GCTACGACGTGGGCTACAG  | CCCTCACACTCAGATCATCTTCT |

## Supplementary Figures

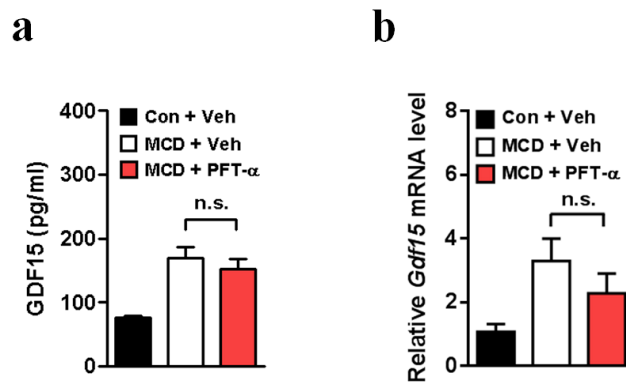

**Supplementary Figure 1.** The effect of p53 inhibitor on GDF15 expression in C57BL/6 mice fed MCD diet. **(a)** Serum GDF15 level in MCD diet-fed C57BL/6 mice after treatment with pifithrin- $\alpha$  (PFT $\alpha$ , 2.2 mg/kg/day) or Veh for 7 days (n = 4). **(b)** Relative hepatic *Gdf15* mRNA expression in MCD diet-fed C57BL/6 mice after treatment with pifithrin- $\alpha$  (PFT $\alpha$ , 2.2 mg/kg/day) (n = 4). Data are means  $\pm$  SEM. n.s. indicates not significant.

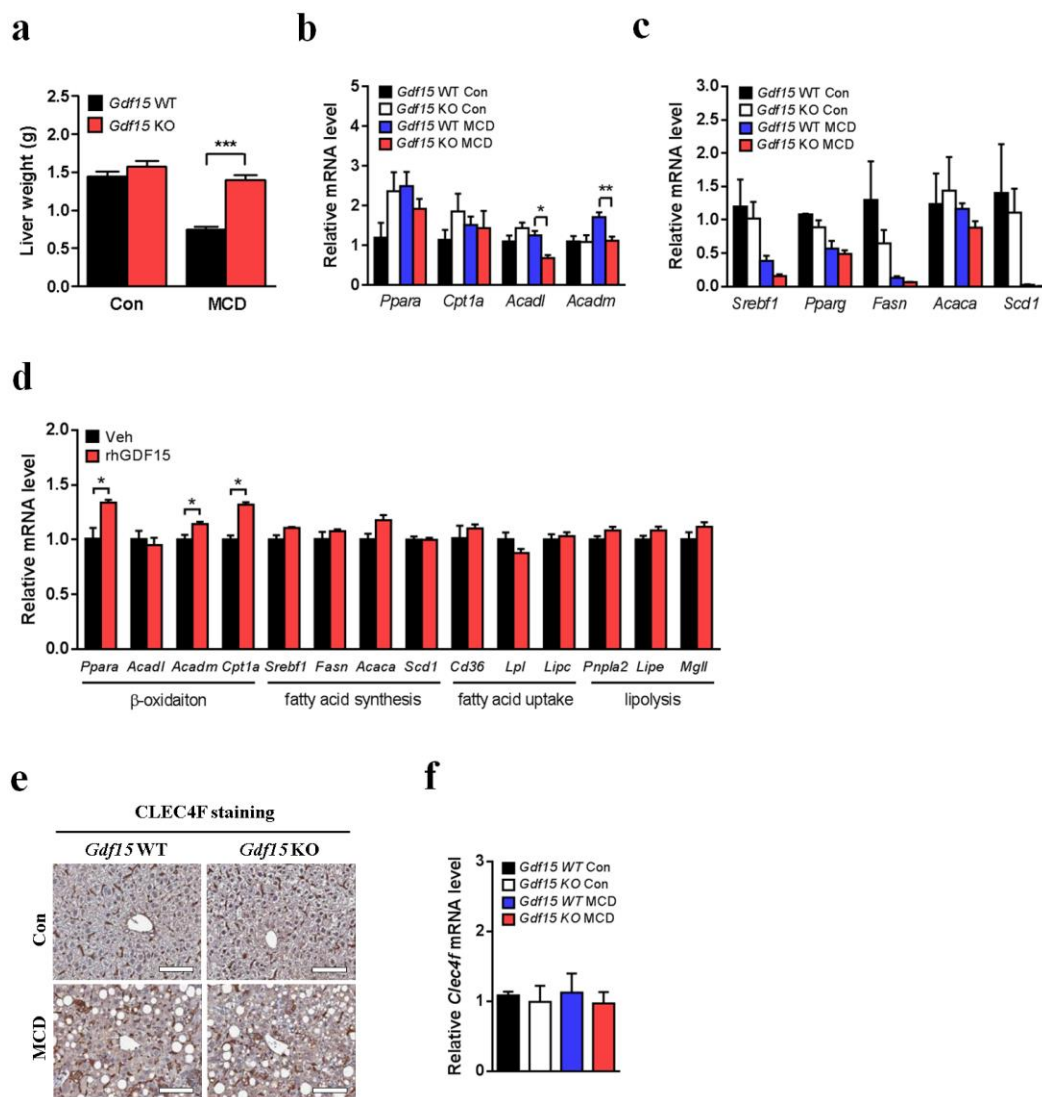

**Supplementary Figure 2.** Effects of *Gdf15* deletion and exogenous GDF15 on NASH and expression of lipid metabolism-related genes. (**a–c**) Liver weight (**a**,  $n = 5-7$ ), and relative expression of  $\beta$ -oxidation-related genes (**b**,  $n = 3-4$ ) or fatty acid synthesis-related genes (**c**,  $n = 3-4$ ) in the liver of *Gdf15*<sup>-/-</sup> and control mice fed MCD or matched control diet. (**d**) Relative expression of hepatic lipid metabolism-related genes in primary mouse hepatocytes treated recombinant human GDF15 (rhGDF15) ( $n = 3$ ). (**e**, **f**) CLEC4F immunohistochemistry of the liver sections (**e**) and relative *Clec4f* mRNA expression in the liver tissues (**f**,  $n = 3-4$ ) from *Gdf15*<sup>-/-</sup> and control mice fed MCD or matched control diet. Scale bars, 100  $\mu$ m. Data are means  $\pm$  SEM. \*  $p < 0.05$ , \*\*  $p < 0.01$ , \*\*\*  $p < 0.001$ .

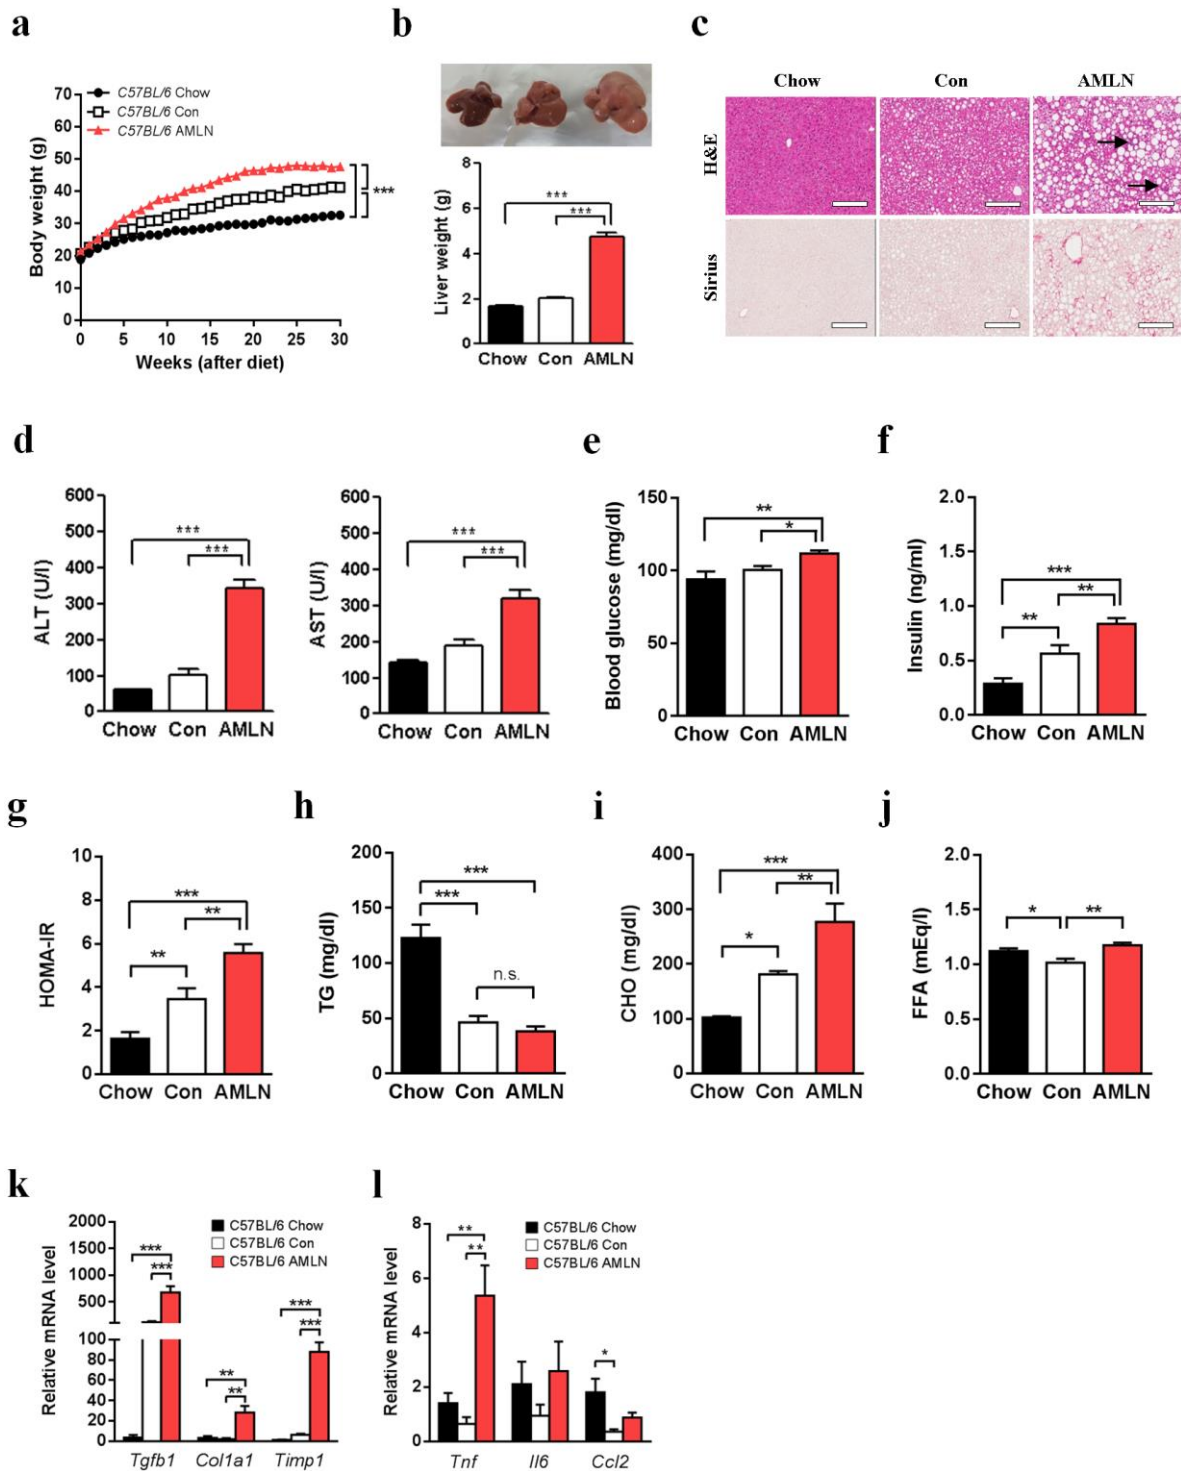

**Supplementary Figure 3.** NASH and metabolic parameters in C57BL/6 mice fed AMLN diet

for 30 weeks. **(a)** Body weight (n = 7). **(b)** Gross image and weight of the liver (n = 7). **(c)** H&E and Sirius red staining of liver sections. Arrows indicate inflammatory loci. **(d)** Serum ALT/AST levels (n = 7). **(e)** Fasting blood glucose level (n = 7). **(f)** Fasting serum insulin level (n = 7). **(g)** HOMA-IR index (n = 7). **(h)** Serum TG level (n = 7). **(i)** Serum cholesterol (CHO) level (n = 7). **(j)** Serum free fatty acid (FFA) level (n = 7). **(k)** Relative expression of fibrosis-related genes in the liver tissue (n = 5-7). **(l)** Relative expression of inflammatory genes in the liver tissue (n = 5-7). Scale bars, 200  $\mu$ m. Data are means  $\pm$  SEM. \*  $p < 0.05$ , \*\*  $p < 0.01$ , \*\*\*  $p < 0.001$ . n.s. indicates not significant.



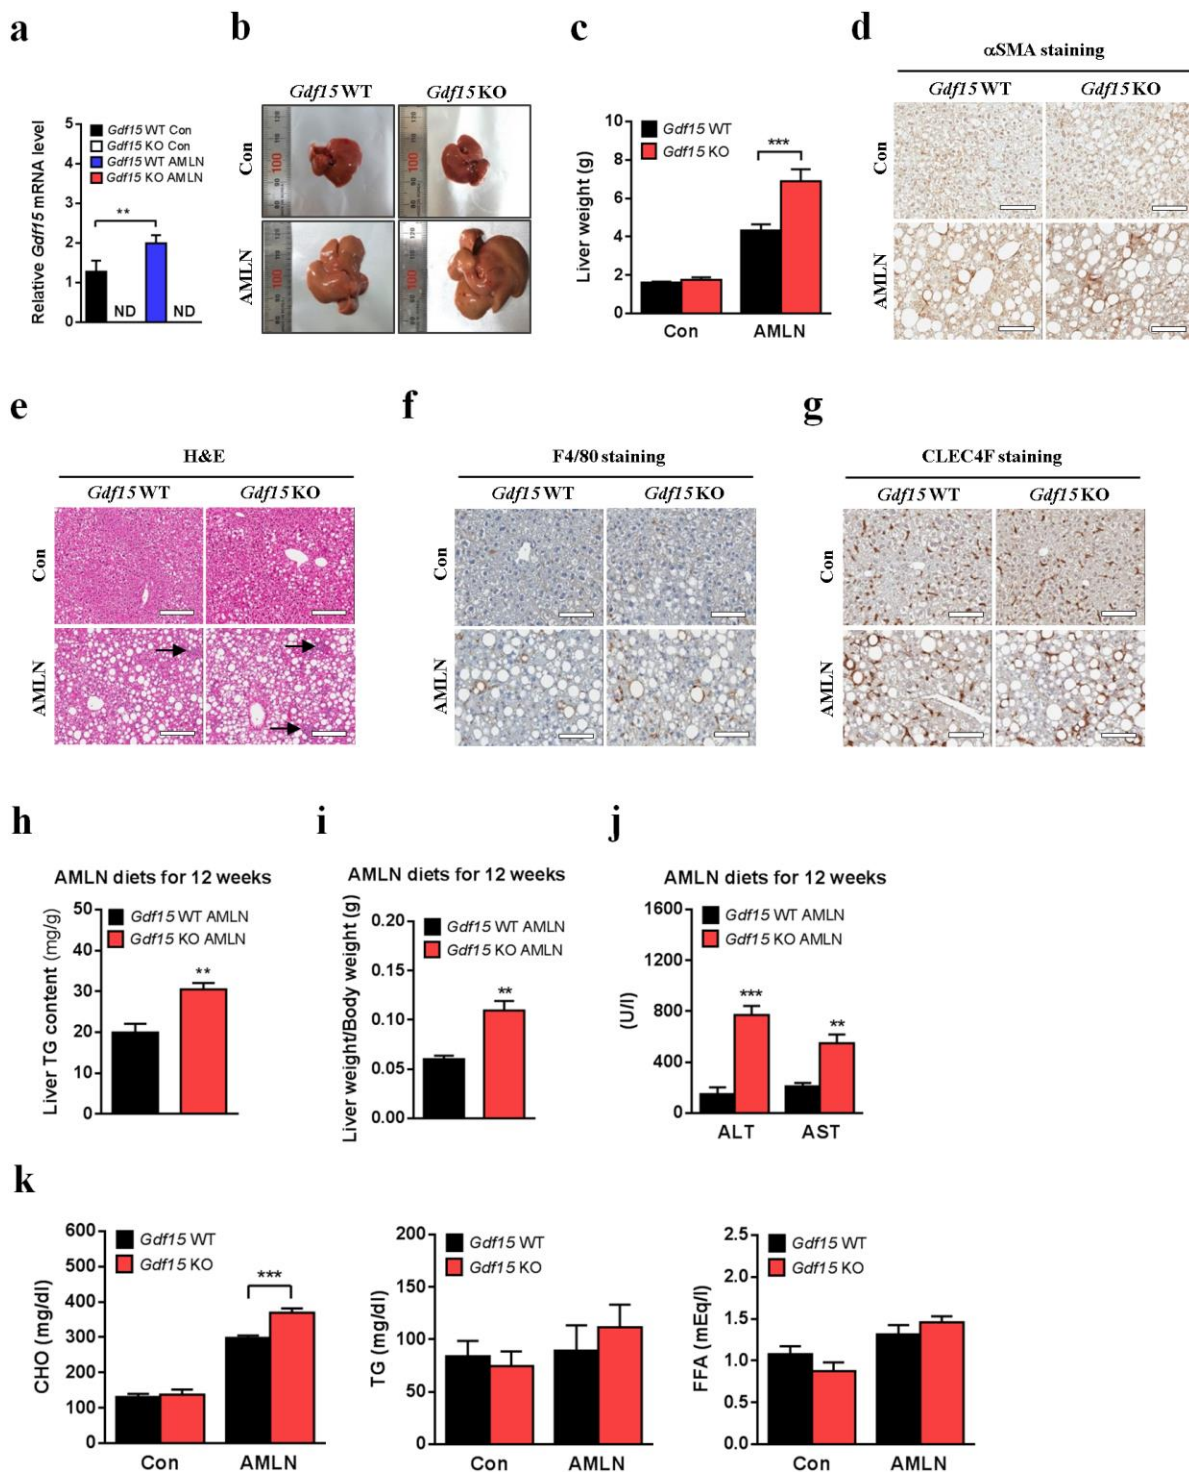

**Supplementary Figure 4.** Effects of *Gdf15* deletion on NASH after AMLN diet feeding. (a–c) Relative hepatic *Gdf15* mRNA expression (a, n = 5–7), gross liver image (b) and liver weight (c,

n = 7-12) of *Gdf15*<sup>-/-</sup> and control mice fed AMLN diet for 30 weeks. ND indicates not detected. **(d-g)**  $\alpha$ SMA immunostaining **(d)**, H&E staining **(e)**, F4/80 immunostaining **(f)** and CLEC4F immunohistochemistry **(g)** of the liver sections from *Gdf15*<sup>-/-</sup> and control mice fed AMLN diet for 30 weeks. Arrows indicate inflammatory loci. **(h-j)** Liver TG content **(h)**, liver weight adjusted for body weight **(i)** and serum ALT/AST levels **(j)** of *Gdf15*<sup>-/-</sup> and control mice fed AMLN diet for 12 weeks (n = 4-5). **(k)** Serum CHO level (left panel of **k**, n = 6-9), serum TG level (middle panel of **k**, n = 6-9) and serum FFA level (right panel of **k**, n = 6-9) of *Gdf15*<sup>-/-</sup> and control mice fed AMLN diet for 30 weeks. Scale bars for H&E staining, 200  $\mu$ m. Scale bars for  $\alpha$ SMA, F4/80 and CLEC4F immunostaining, 100  $\mu$ m. Data are means  $\pm$  SEM. \*\*  $p < 0.01$ , \*\*\*  $p < 0.001$ .

**a**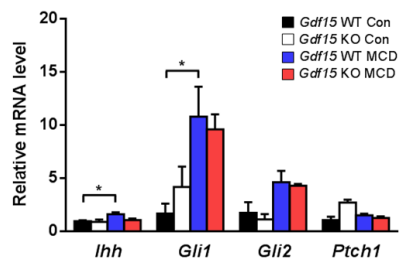**b**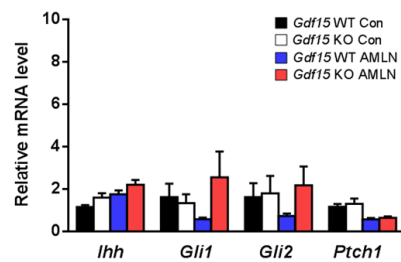

**Supplementary Figure 5.** Gene expression of Hedgehog pathway in the livers of *Gdf15*<sup>-/-</sup> mice fed MCD or AMLN diet. **(a)** Relative expression of Hedgehog signaling-related genes in the livers of *Gdf15*<sup>-/-</sup> and control mice fed MCD (n = 3-4). **(b)** Relative expression of Hedgehog signaling-related genes in the livers of *Gdf15*<sup>-/-</sup> and control mice fed AMLN diet (n = 5-7). Data are means  $\pm$  SEM. \*  $p < 0.05$ .

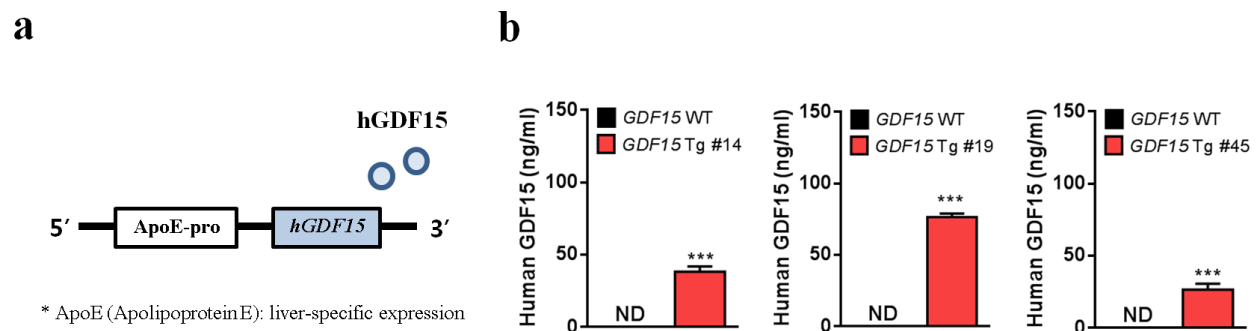

**Supplementary Figure 6.** Generation of *GDF15*-Tg mice. **(a)** Schematic diagram of construct driving overexpression of human *GDF15* under the control of the apolipoprotein promoter (ApoE-pro) that was used to generate *GDF15*-Tg mice. **(b)** Serum human *GDF15* levels in 20-week-old *GDF15*-Tg line 14 (left panel, n = 2-5), 8-week-old *GDF15*-Tg line 19 (middle panel, n = 5-11), and 20-week-old *GDF15*-Tg line 45 mice (right panel, n = 6-7). ND indicates not detected.

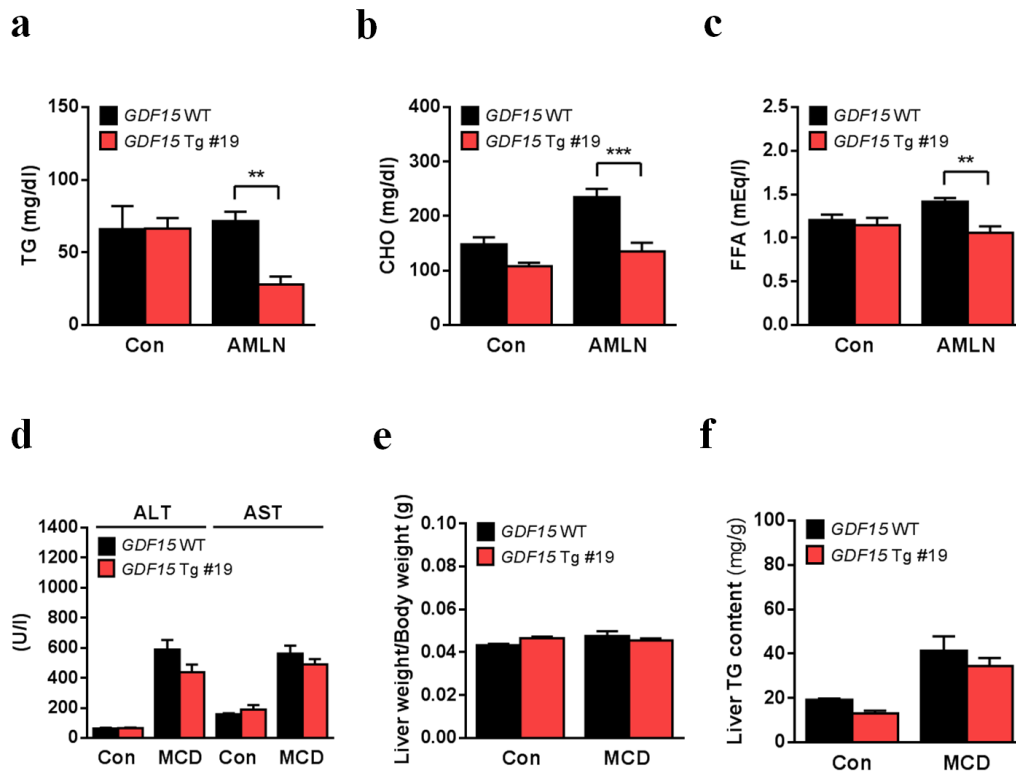

**Supplementary Figure 7.** NASH-related metabolic profile in *GDF15*-Tg mouse line 19. (a–c) Serum TG level (a), serum CHO level (b) and serum FFA level (c) in *GDF15*-Tg line 19 mice and control mice fed AMLN diet for 22 weeks (n = 4-11). (d–f) Serum ALT/AST levels (d, n = 3-10), liver weight adjusted for body weight (e, n = 3-6) and liver TG content (f, n = 3-6) in *GDF15*-Tg line 19 mice and control mice fed MCD diet for 7 weeks. Data are means  $\pm$  SEM. \*\*  $p < 0.01$ , \*\*\*  $p < 0.001$ .

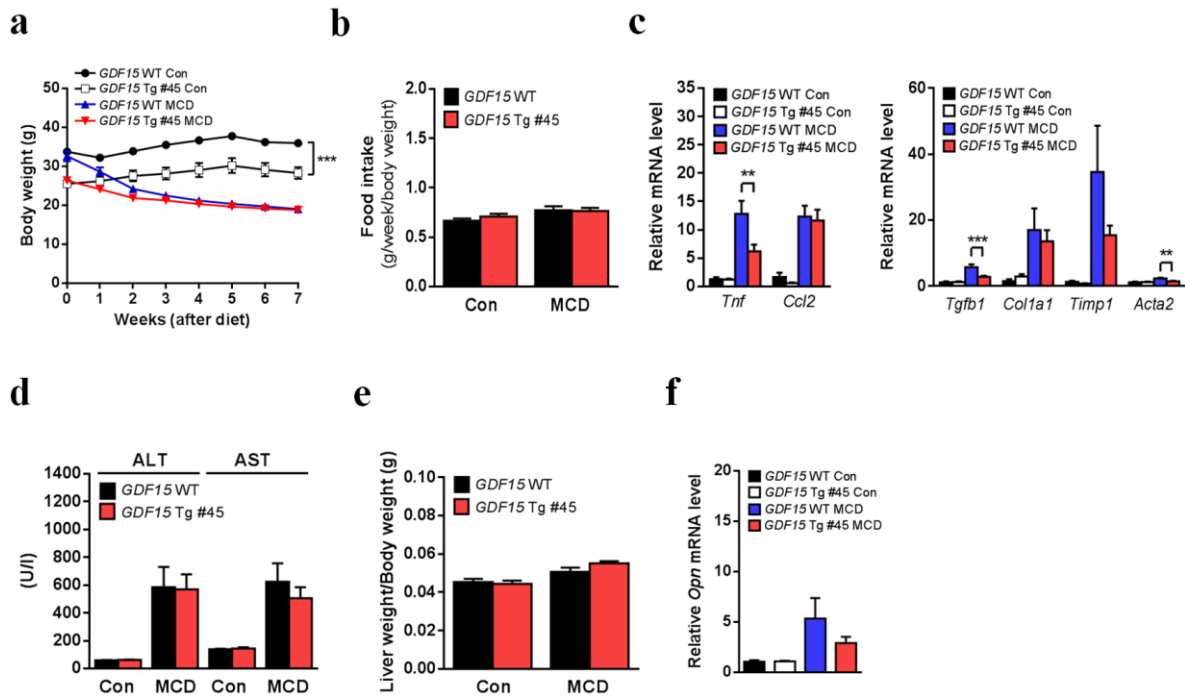

**Supplementary Figure 8.** NASH-related metabolic profile in *GDF15*-Tg mouse line 45 fed MCD diet for 7 weeks. **(a)** Body weight. **(b)** Food intake adjusted for body weight. **(c)** Relative inflammatory gene expression (left panel) and relative fibrosis-related gene expression (right panel). **(d)** Serum ALT/AST levels. **(e)** Liver weight adjusted for body weight. **(f)** Relative *Opn* mRNA expression in the liver tissue. Data are means  $\pm$  SEM. \*\*  $p < 0.01$ , \*\*\*  $p < 0.001$ . (n = 6-7).

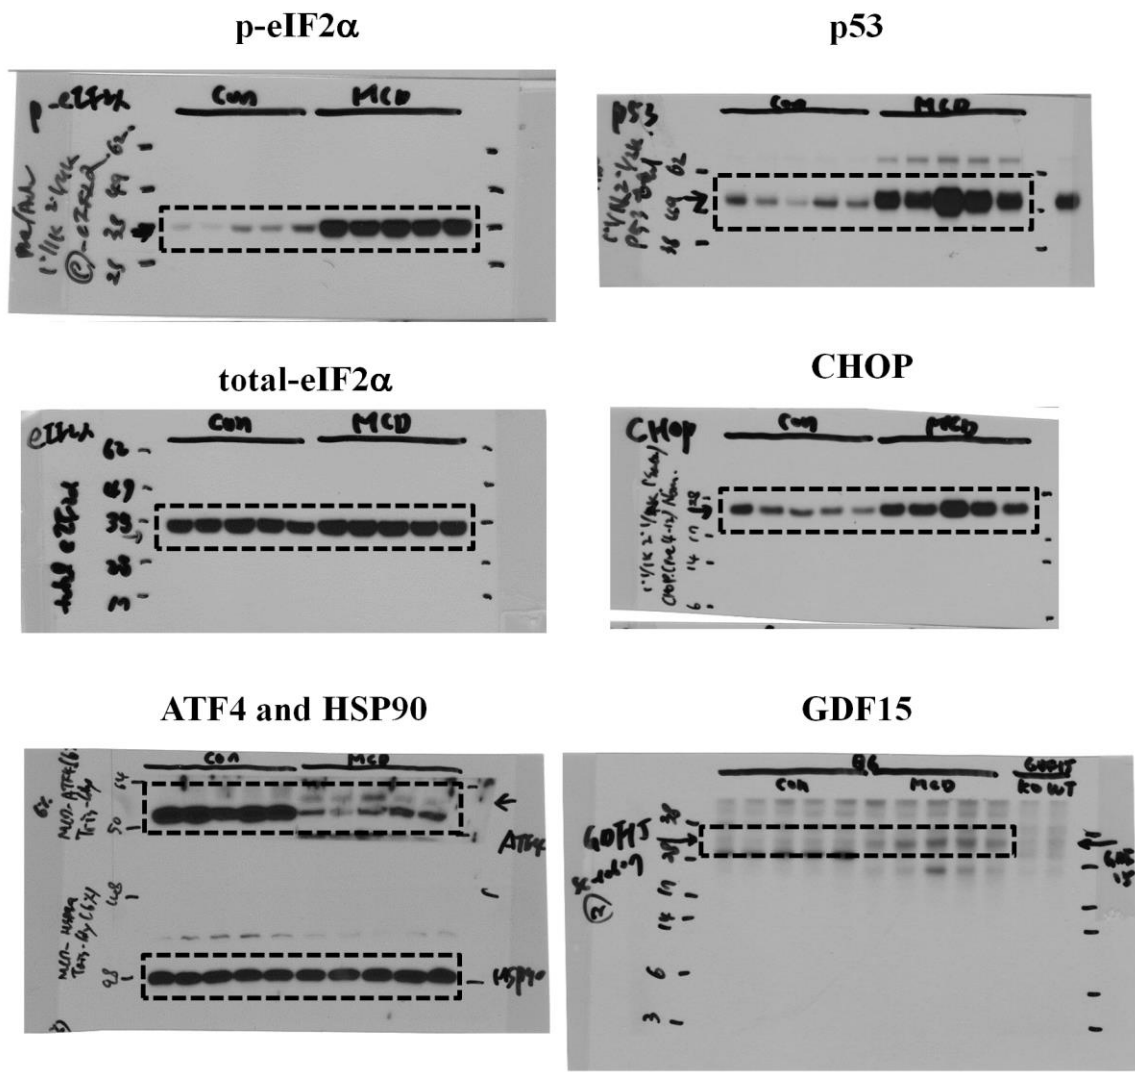

Supplementary Figure 9. Full scan original films of Western blot analysis in Figure 2a.
